# Supplementary material
Source: PubMed Central journal article supplement (PMC3877815)
Supplement: supp_tpc.113.117770_tpc117770Supplemental.pdf [file supp_tpc.113.117770_tpc117770Supplemental.pdf]

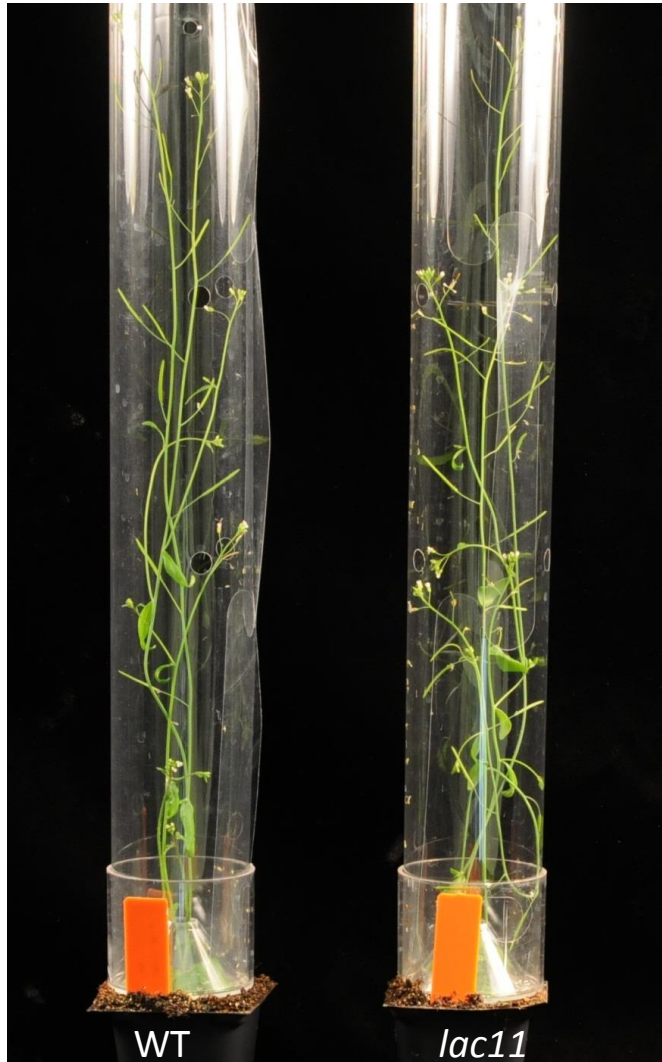

**Figure S1.** Seven-week-old wild-type and *lac11-1* mutant plants grown in the growth chamber. The single mutant appears to exhibit normal growth.

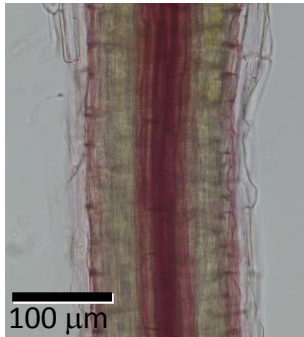

*lac4 lac11*

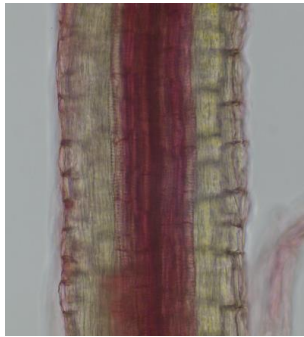

*lac11 lac17*

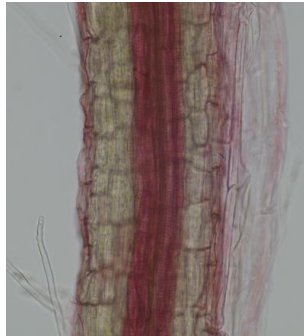

*lac4 lac17*

**Figure S2.** Phloroglucinol staining of roots of three-week-old plants. All three *lac* double mutants exhibit normal red lignin staining.

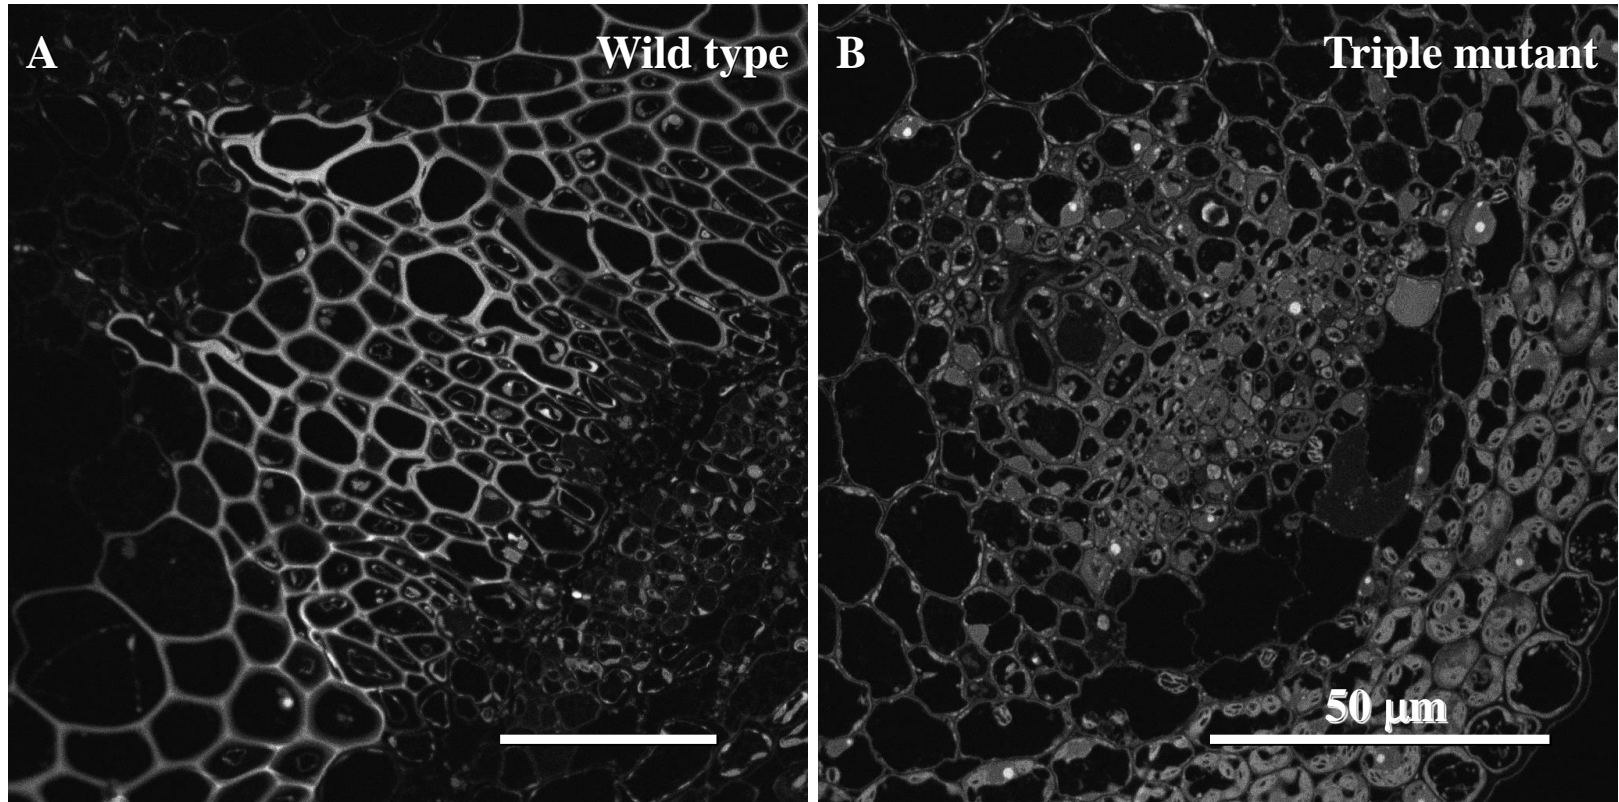

**Figure S3.** UV autofluorescence of stem cross sections. Serial semi-thin sections that were presented in Figure 3D were further examined under a 405 nm blue diode laser. There was little visible phenolic material accumulated in cell walls of the triple mutant, whereas lignin autofluorescence is clearly evident in xylem tissues of the wild type. Note the stem tissues from the triple mutant contain abundant cytoplasmic components and organelles (autofluorescence) especially chloroplasts in the cortex.

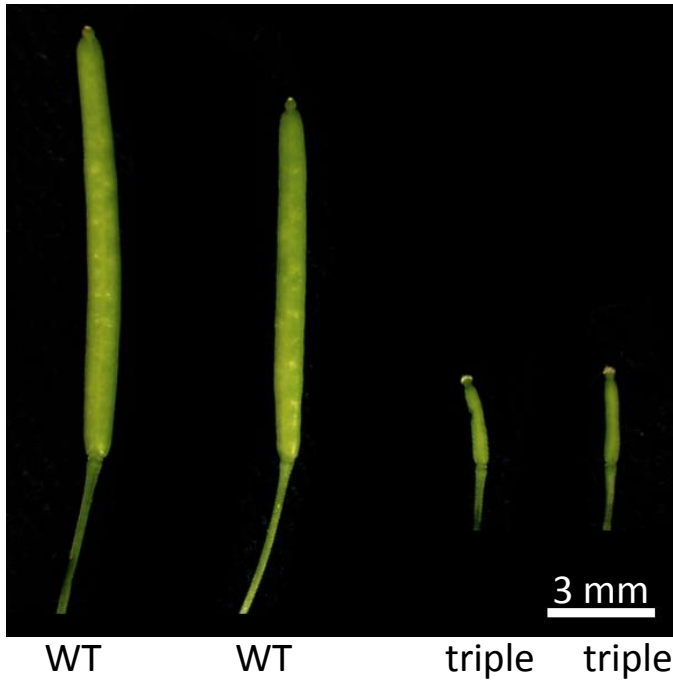

**Figure S4.** Siliques of wild type and laccase triple mutant. The triple mutant produces few siliques, and these are much smaller than the wild-type siliques

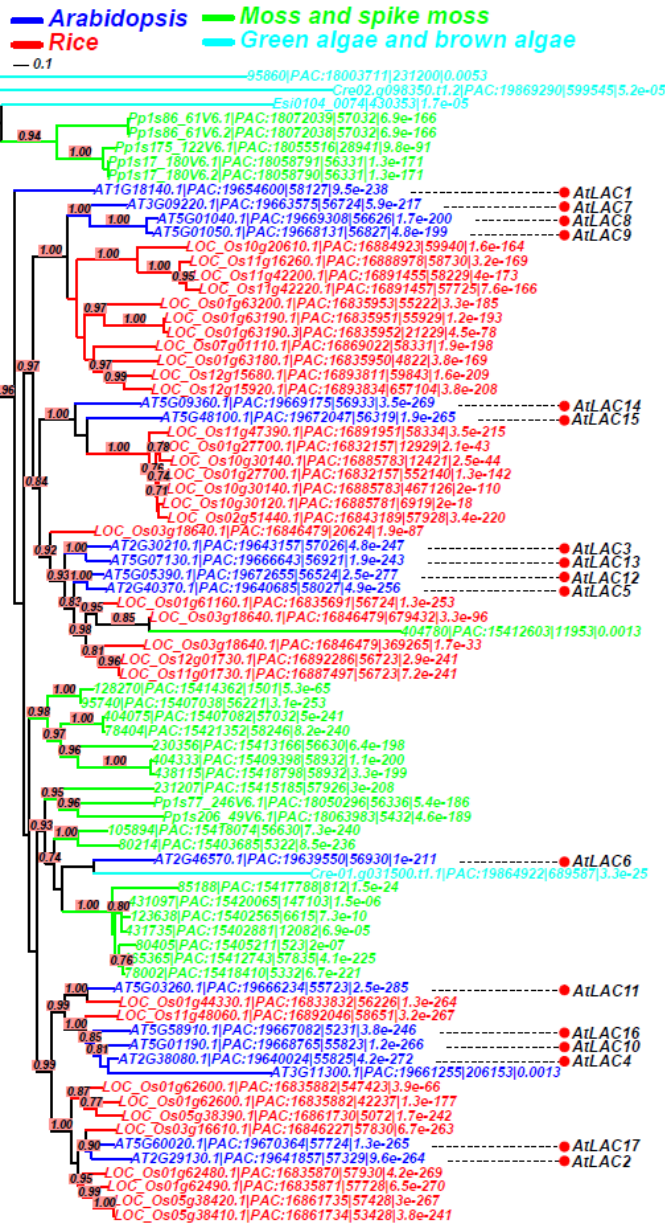

**Figure S5.** Phylogeny of higher and lower plant LACCASE proteins. This phylogeny includes eight different species and shows the evolutionary putative orthologs of *Arabidopsis* LACCASE in other species. The scale bar represents evolutionary distance of 0.1 amino acid substitutions per site. The numbers on each node are the bootstrap values, with 1.00 meaning a 100% support for the offspring nodes.

**Table S1.** Total lignin content of *Arabidopsis lac 11* single and double mutants as determined by the acetyl bromide method.

| Line                   | Lignin content (mg/g CWR) |
|------------------------|---------------------------|
| Wild type              | 157±3.1                   |
| <i>lac4-2</i>          | 150±2.1                   |
| <i>lac11-1</i>         | 155±1.8                   |
| <i>lac17-1</i>         | 152±3.6                   |
| <i>lac4-2 lac11-1</i>  | 141±2.8*                  |
| <i>lac11-1 lac17-1</i> | 145±2.8*                  |

All data are means ± SE (n = 6). Asterisks indicate values that were determined by Student's *t*-test to be significantly different from the wild-type control (P < 0.05).

**Table S2.** Additional lignin-associated genes with altered expression in the laccase triple mutant

| <i>Putative gene</i>          | <i>At Number</i> | <i>Gene Description</i>  | <i>Mu/WT</i> | <i>Ave WT</i> | <i>SD WT</i> | <i>Ave Mu</i> | <i>SD Mu</i> |
|-------------------------------|------------------|--------------------------|--------------|---------------|--------------|---------------|--------------|
| Pinoresinol reductase1 (PrR1) | At1g32100        | Lignan biosynthetic gene | 1.68         | 405           | 28           | 680           | 80           |
| Pinoresinol reductase2 (PrR2) | At4g13660        | Lignan biosynthetic gene | 4.0          | 365           | 43           | 1469          | 87           |
| Peroxidase                    | At5g19890        | Peroxidase               | 9.8          | 79            | 21           | 766           | 393          |
| Peroxidase                    | At3g21770        | Peroxidase               | 9.4          | 342           | 141          | 3206          | 234          |
| Peroxidase                    | At1g49570        | Peroxidase               | 8.8          | 41            | 1.1          | 362           | 80           |
| Peroxidase                    | At2g38390        | Peroxidase               | 7.3          | 378           | 155          | 2751          | 605          |
| Peroxidase                    | At2g18140        | Peroxidase               | 7.2          | 158           | 0.9          | 1131          | 129          |
| Peroxidase                    | At5g64120        | Peroxidase               | 6.7          | 650           | 35           | 4378          | 576          |
| Peroxidase                    | At4g30170        | Peroxidase               | 5.9          | 475           | 188          | 2818          | 396          |
| Peroxidase                    | At4g36430        | Peroxidase               | 5.4          | 313           | 54           | 1699          | 21           |
| Peroxidase                    | At5g06730        | Peroxidase               | 5.3          | 30            | 6            | 160           | 22           |
| Peroxidase                    | At4g08770        | Peroxidase               | 5.3          | 140           | 90           | 742           | 309          |
| Peroxidase                    | At5g64110        | Peroxidase               | 5.3          | 59            | 2.5          | 314           | 95           |
| Peroxidase                    | At2g18980        | Peroxidase               | 4.3          | 227           | 91           | 977           | 158          |
| Peroxidase                    | At5g64100        | Peroxidase               | 3.8          | 1256          | 24           | 4842          | 451          |
| Peroxidase                    | At4g11290        | Peroxidase               | 3.7          | 150           | 39           | 560           | 232          |
| Peroxidase                    | At4g08780        | Peroxidase               | 3.7          | 37            | 5.5          | 139           | 35           |
| Peroxidase                    | At2g39040        | Peroxidase               | 3.5          | 56            | 18           | 194           | 85           |
| Peroxidase                    | At3g01190        | Peroxidase               | 3.0          | 378           | 118          | 1117          | 213          |
| Peroxidase                    | At5g14130        | Peroxidase               | 2.4          | 48            | 0.2          | 116           | 31           |
| Peroxidase                    | At5g06720        | Peroxidase               | 2.3          | 57            | 10           | 132           | 16           |
| Peroxidase                    | At4g37530        | Peroxidase               | 2.3          | 603           | 188          | 1037          | 47           |
| Peroxidase                    | At2g37130        | Peroxidase               | 2.2          | 846           | 24           | 1830          | 182          |
| Laccase3                      | At2g30210        | Putative laccase         | 4.0          | 181           | 20           | 720           | 254          |
| Laccase7                      | At3g09220        | Putative laccase         | 3.9          | 481           | 78           | 1855          | 210          |
| Laccase5                      | At2g40370        | Putative laccase         | 2.5          | 49            | 10           | 124           | 26           |

|         |           |                                                                    |      |      |     |      |     |
|---------|-----------|--------------------------------------------------------------------|------|------|-----|------|-----|
| SGT     | At3g21560 | Sinapic acid:UDP-glucose glucosyltransferase                       | 2.6  | 164  | 31  | 433  | 84  |
| SMT     | At2g22990 | Sinapoylglucose:malate sinapoyltransferase                         | 0.33 | 3820 | 365 | 1266 | 454 |
| At-LIGB | At4g15093 | Catalytic LigB subunit of aromatic ring-opening dioxygenase family | 2.5  | 590  | 87  | 1470 | 111 |

Mu, laccase triple mutant; WT, wild type; SD, standard deviation (n = 3).



**Table S3.** Plant species used in the phylogenetic analysis.

| Species                                 | clade                     | # of UniGenes/proteins |
|-----------------------------------------|---------------------------|------------------------|
| <i>Cyanidioschyzon merolae 10D</i>      | unicellular red algae     | 5014                   |
| <i>Chlamydomonas reinhardtii</i>        | chlorophytic green algae  | 14598                  |
| <i>Ectocarpus siliculosus</i>           | multicellular brown algae | 16533                  |
| <i>Volvox carteri</i>                   | multicellular green algae | 14542                  |
| <i>Mesostigma viride</i>                | multicellular green algae | 7371                   |
| <i>Marchantia polymorpha</i>            | liverwort                 | 10959                  |
| <i>Physcomitrella patens ssp patens</i> | moss                      | 35938                  |
| <i>Selaginella moellendorffii</i>       | spike moss                | 34697                  |
| <i>Adiantum capillus veneris</i>        | fern                      | 16944                  |
| <i>Pinus taeda</i>                      | gymnosperms               | 77540                  |
| <i>Arabidopsis thaliana</i>             | dicot                     | 33410                  |
| <i>Oryza sativa</i>                     | monocot                   | 51258                  |

Species shaded in grey represent eight sequenced plant genomes from Phytozome v7.0; the remaining are EST assemblies taken from plantGDB in 2013. The species are ordered from lower plants to higher plants.
